# Supplementary material for: Stringent containment measures without complete city lockdown to achieve low incidence and mortality across two waves of COVID-19 in Hong Kong
Source: HighWire-hosted journal article supplement (doi:10.1136/bmjgh-2020-003573), 2020-10-01
Supplement: bmjgh-2020-003573supp001_data_supplement.pdf [file bmjgh-2020-003573supp001_data_supplement.pdf]

**Supplementary Table 1**      **Characteristics of first 1038 confirmed COVID-19 cases in Hong Kong**

|                                       | <b>1<sup>st</sup> wave<br/>n = 89</b> | <b>2<sup>nd</sup> wave<br/>n = 949</b> | <b>Overall<br/>N = 1038</b> | <b>P-value*</b> |
|---------------------------------------|---------------------------------------|----------------------------------------|-----------------------------|-----------------|
| <b>Age: mean (SD) years</b>           |                                       |                                        |                             |                 |
|                                       | 55.8 (17.4)                           | 36.1 (16.8)                            | 37.8 (17.8)                 | <0.001          |
| <b>Sex: N (%)</b>                     |                                       |                                        |                             |                 |
| Male                                  | 44 (49.4)                             | 513 (54.1)                             | 557 (53.7)                  | 0.403           |
| Female                                | 45 (50.6)                             | 436 (46.0)                             | 481 (46.3)                  |                 |
| <b>Source: N (%)</b>                  |                                       |                                        |                             |                 |
| Imported                              | 19 (21.4)                             | 597 (62.9)                             | 616 (59.3)                  | <0.001          |
| Local                                 | 70 (78.7)                             | 352 (37.1)                             | 422 (40.7)                  |                 |
| <b>Means of identification: N (%)</b> |                                       |                                        |                             |                 |
| Seek medical care for symptoms        | 63 (70.8)                             | 490 (51.6)                             | 553 (53.3)                  | 0.001           |
| Port health screening                 | 2 (2.3)                               | 31 (3.3)                               | 33 (3.2)                    | 1.000           |
| Quarantine camps**                    | 7 (7.9)                               | 58 (6.1)                               | 65 (6.3)                    | 0.514           |
| Home quarantine**                     | 0 (0)                                 | 325 (34.2)                             | 325 (31.3)                  | <0.001          |
| Contact tracing                       | 16 (18.0)                             | 45 (4.7)                               | 61 (5.9)                    | <0.001          |
| Hospitalized for other reasons        | 1 (1.1)                               | 0 (0)                                  | 1 (0.1)                     | 0.086           |

\*Student's t-test was used to compare the difference in mean age between the first and second wave. Chi-square tests or Fisher's exact tests were used to compare other variables between the two waves.

\*\*Developed symptoms while staying in quarantine camps or during home quarantine.
