# Supplementary figures and images for: Stringent containment measures without complete city lockdown to achieve low incidence and mortality across two waves of COVID-19 in Hong Kong
Source: HighWire-hosted journal article supplement (doi:10.1136/bmjgh-2020-003573), 2020-10-01

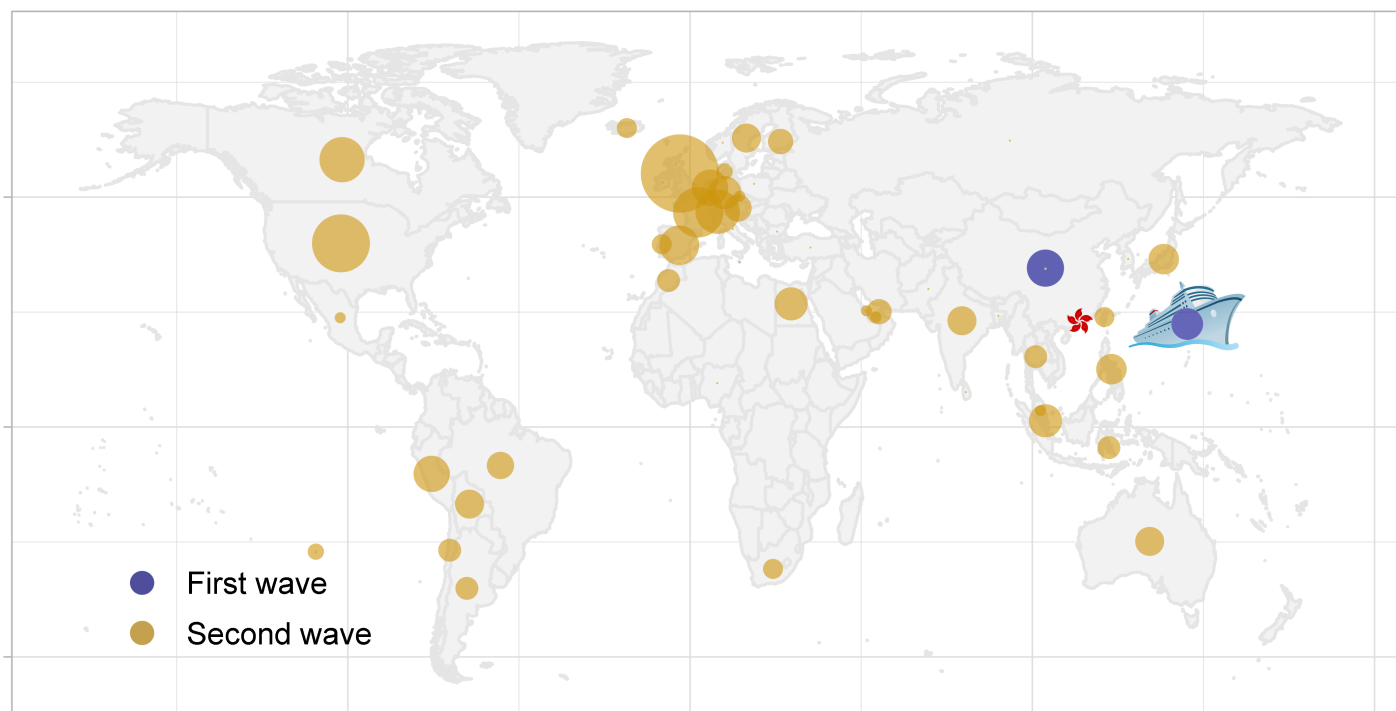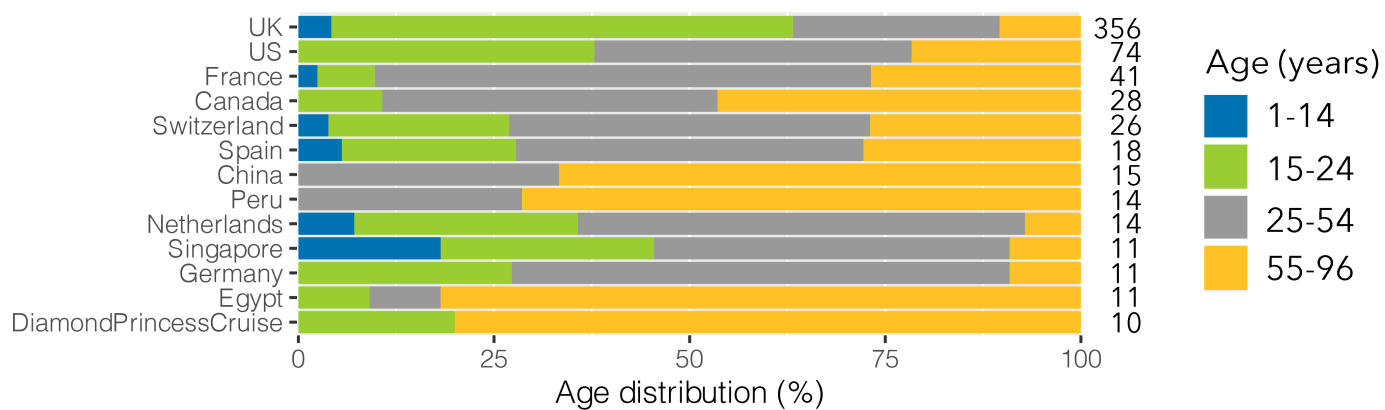

Supplement: bmjgh-2020-003573supp002_data_supplement.pdf [file bmjgh-2020-003573supp002_data_supplement.pdf]
